# Supplementary material for: Stability of Proteins in Dried Blood Spot Biobanks
Source: PubMed Central journal article supplement (PMC5500761; doi:10.1074/mcp.ra117.000015), 2017-05-13
Supplement: supp_RA117.000015_4536_1_supp_927_tqjtkm.pdf [file supp_RA117.000015_4536_1_supp_927_tqjtkm.pdf]

# Stability of Proteins in Dried Blood Spot Biobanks

Johan Björkesten, Stefan Enroth, Qiujin Shen, Lotta Wik, David M. Hougaard, Arieh S. Cohen, Lene Sörensen, Vilmantas Giedraitis, Martin Ingelsson, Anders Larsson, Masood Kamali Moghaddam and Ulf Landegren\*

\*To whom the correspondence should be addressed: [ulf.landegren@igp.uu.se](mailto:ulf.landegren@igp.uu.se)

## Supplemental Figures and Tables

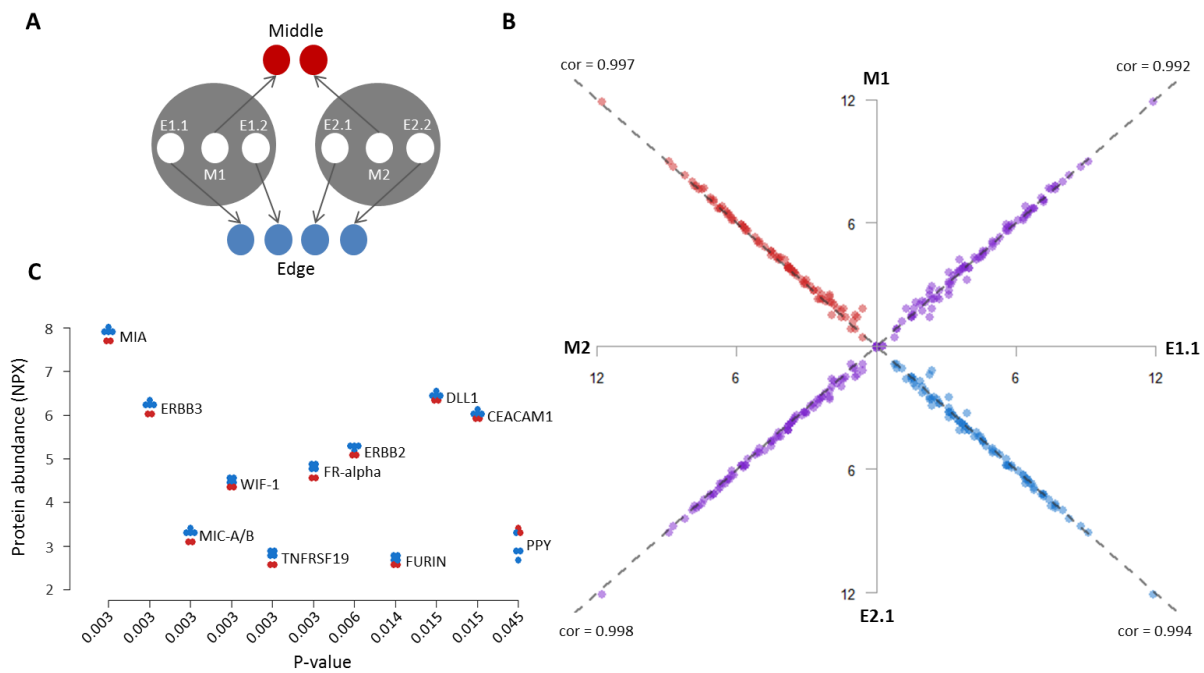

**Supplemental Figure S1.** Evaluation of DBS homogeneity by analysis of protein abundance by analysis of disks punched out from the middle and edges of two equivalent DBS. A) Schematic figure of the analyzed samples. Two equivalent DBS (grey) were prepared and three 1.2 mm diameter disks (two from the edge and one from the middle) were punched out from each of them. Abundances of 92 proteins were measured from each disk by PEA. The disks were grouped as edge or middle for statistical analysis. B) Relations between replicates evaluating potential differences between samples from the middle and edge of DBS and two equivalent DBS are visualized in a scatterplot, containing four correlations. Correlation between samples from the middle of two equivalent DBS (red) were 0.997. Correlation between samples from the edge of two equivalent DBS (blue) were 0.994. Correlations between samples from the edge and middle of each of the two DBS (purple) were 0.992 and 0.998, respectively. The dashed grey lines corresponds to the equivalence between compared samples ( $x = y$ ). Individual levels of LOD ( $\log_2$ -scale) have been subtracted from NPX values ( $\log_2$ -scale) for each protein. Any resulting negative values (signals below LOD) were set to zero. C) Independent 2-group t-tests were performed for each of the 92 proteins to evaluate potential differences between the edge and middle groups. 11 out of the 92 proteins analyzed exhibited nominally significant differences ( $p$ -value  $< 0.05$ ), however, none of the analyzed proteins were significantly different when correcting for multiple hypothesis testing (Bonferroni,  $p$ -value  $< 0.05/92$ ). Individual protein abundances (NPX values on  $\log_2$ -scale), measured in samples from the middle (red) and edge (blue) of DBS for the 11 nominally significantly changed proteins, was

visualized as bee swarm plots. The bee swarm representations are sorted from left to right based on increasing p-value. The short name of the respective protein is shown next to the corresponding data points.

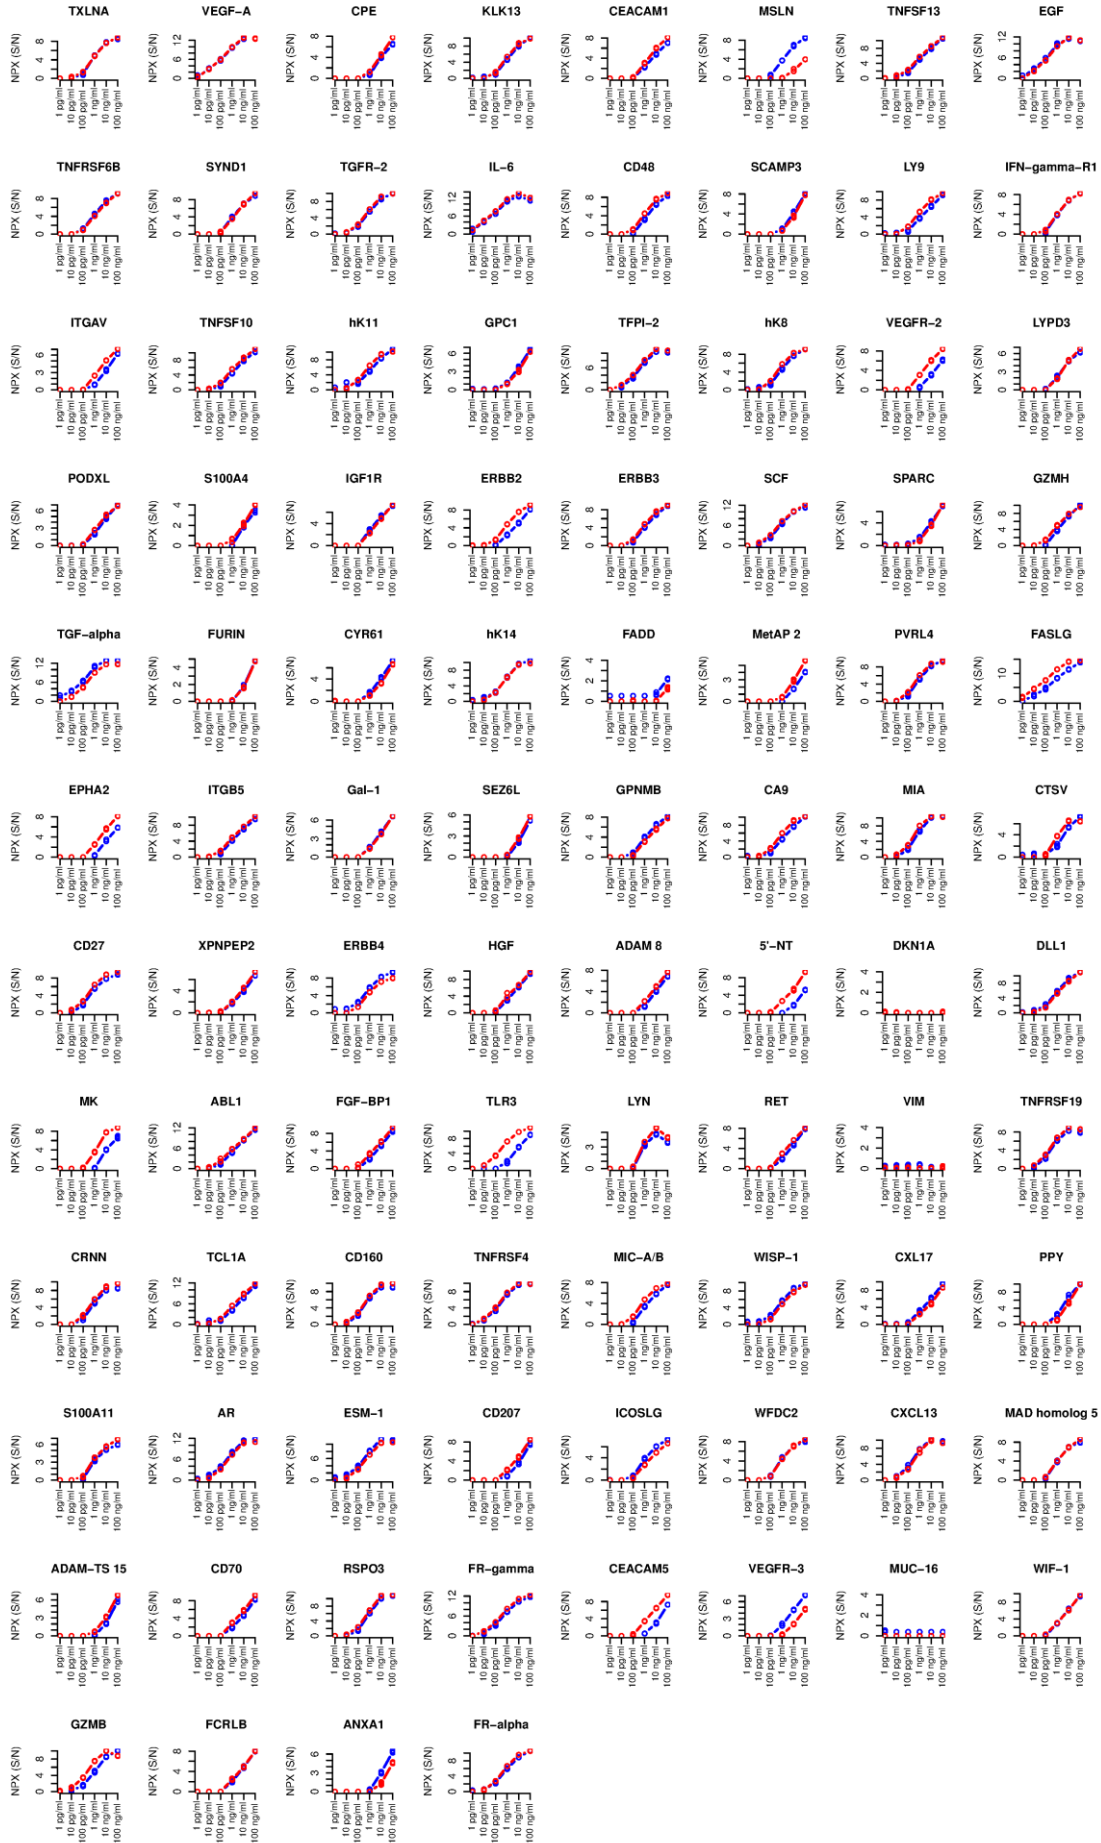

**Supplemental Figure S2.** Individual plots of NPX-values above LOD for 10-fold dilution series (1 pg/ml - 100 ng/ml) for a pool of 92 measured recombinant proteins in purified form. Both wet (red) and dried (blue) samples were analyzed. All data points from technical triplicates are plotted in the figure although data largely overlap due to the high precision of PEA multiplex measurements. The lines connecting the data points were drawn between the mean values of the technical triplicates for each concentration. The Proseek multiplex panel used for the analysis was Oncology I v2.

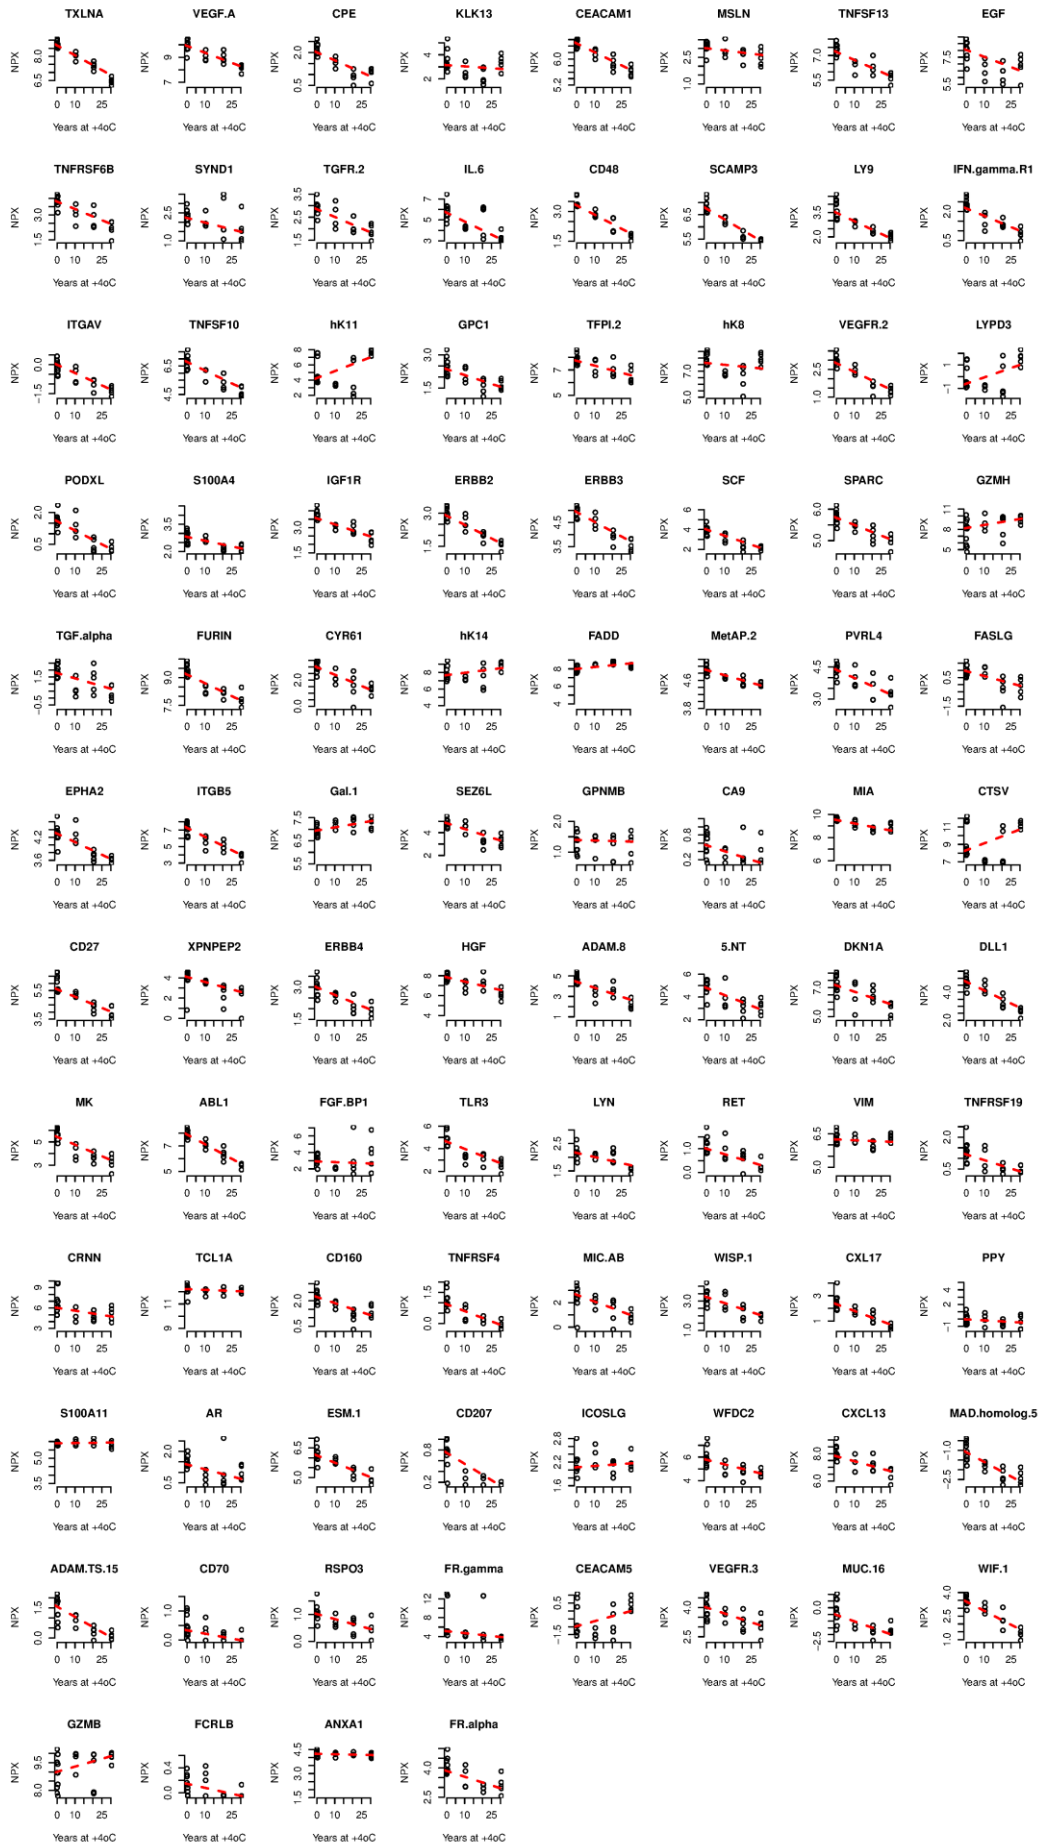

**Supplemental Figure S3.** Individual linear regression models (dashed red lines) for all 92 proteins measured in DBS samples stored between 0 and 30 years at +4°C. The models were based on storage time in years and protein abundance as NPX values on a  $\log_2$  scale.

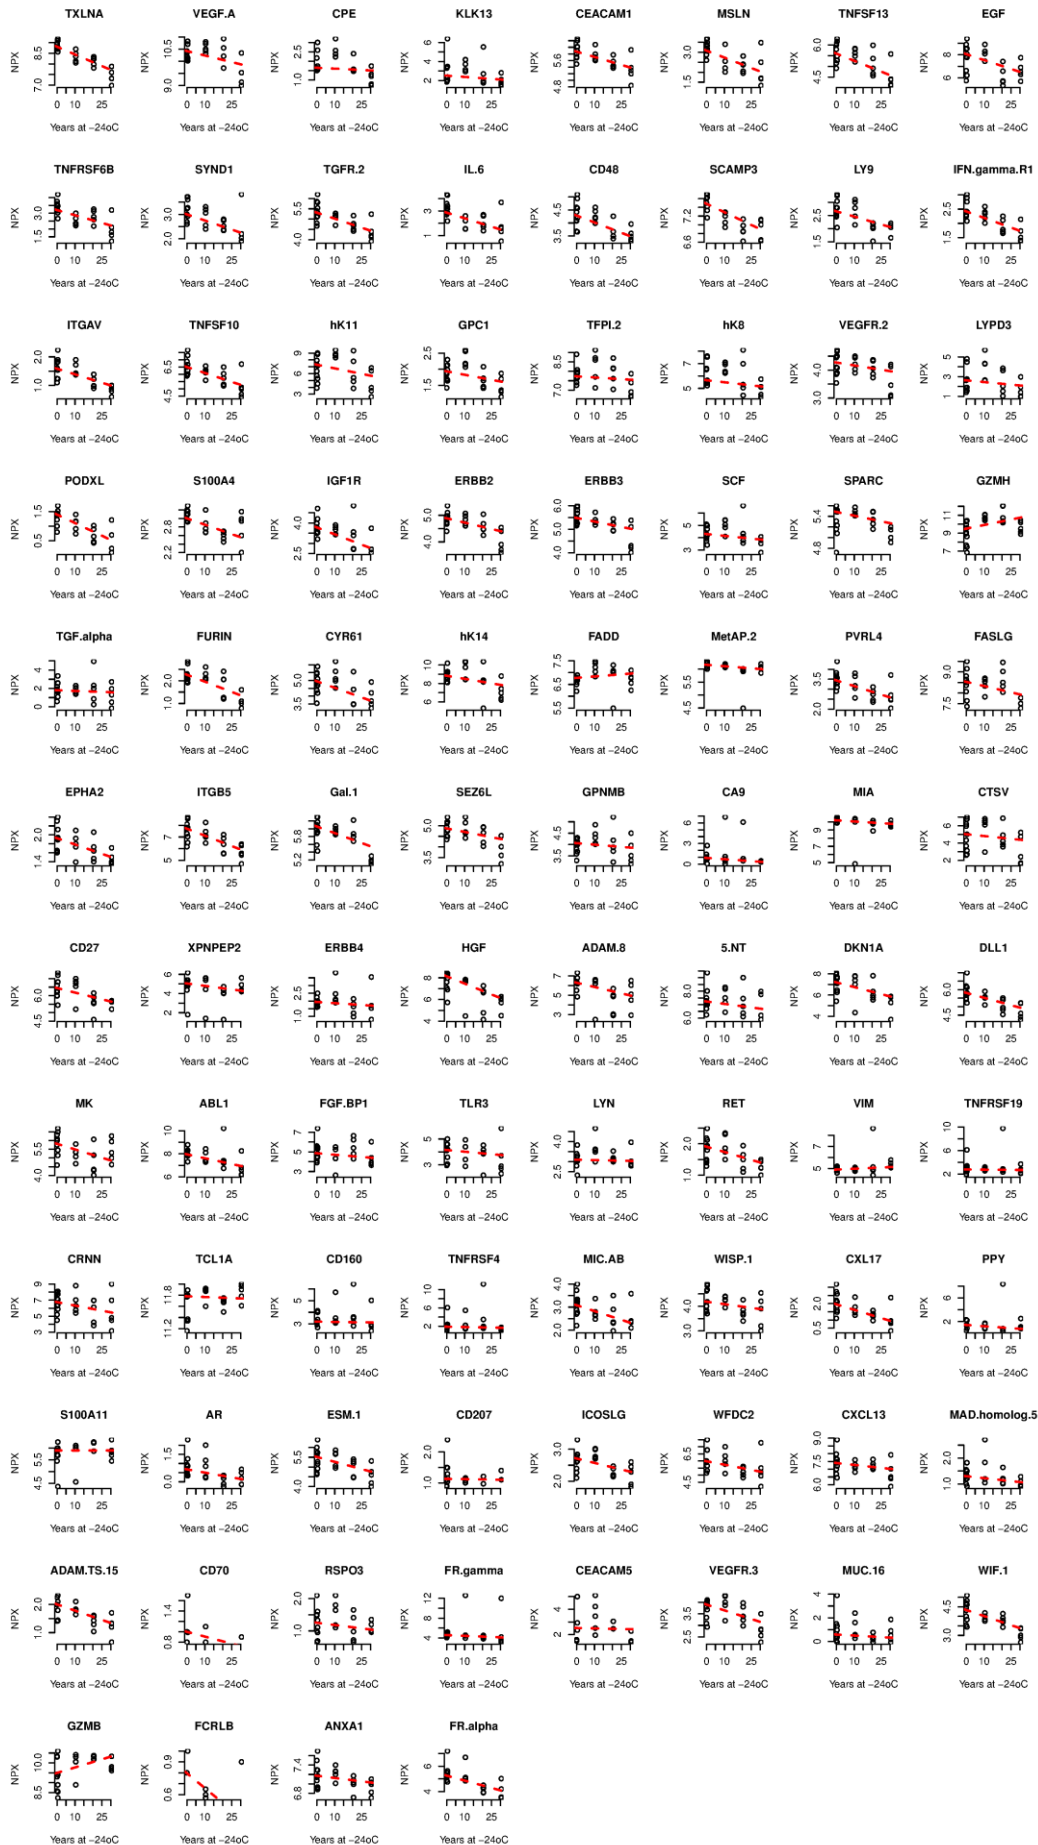

**Supplemental Figure S4.** Individual linear regression models (dashed red lines) for all 92 proteins measured from DBS samples stored between 0 and 30 years at -24°C. The models were based on storage time in years and protein abundance as NPX values on a  $\log_2$  scale.



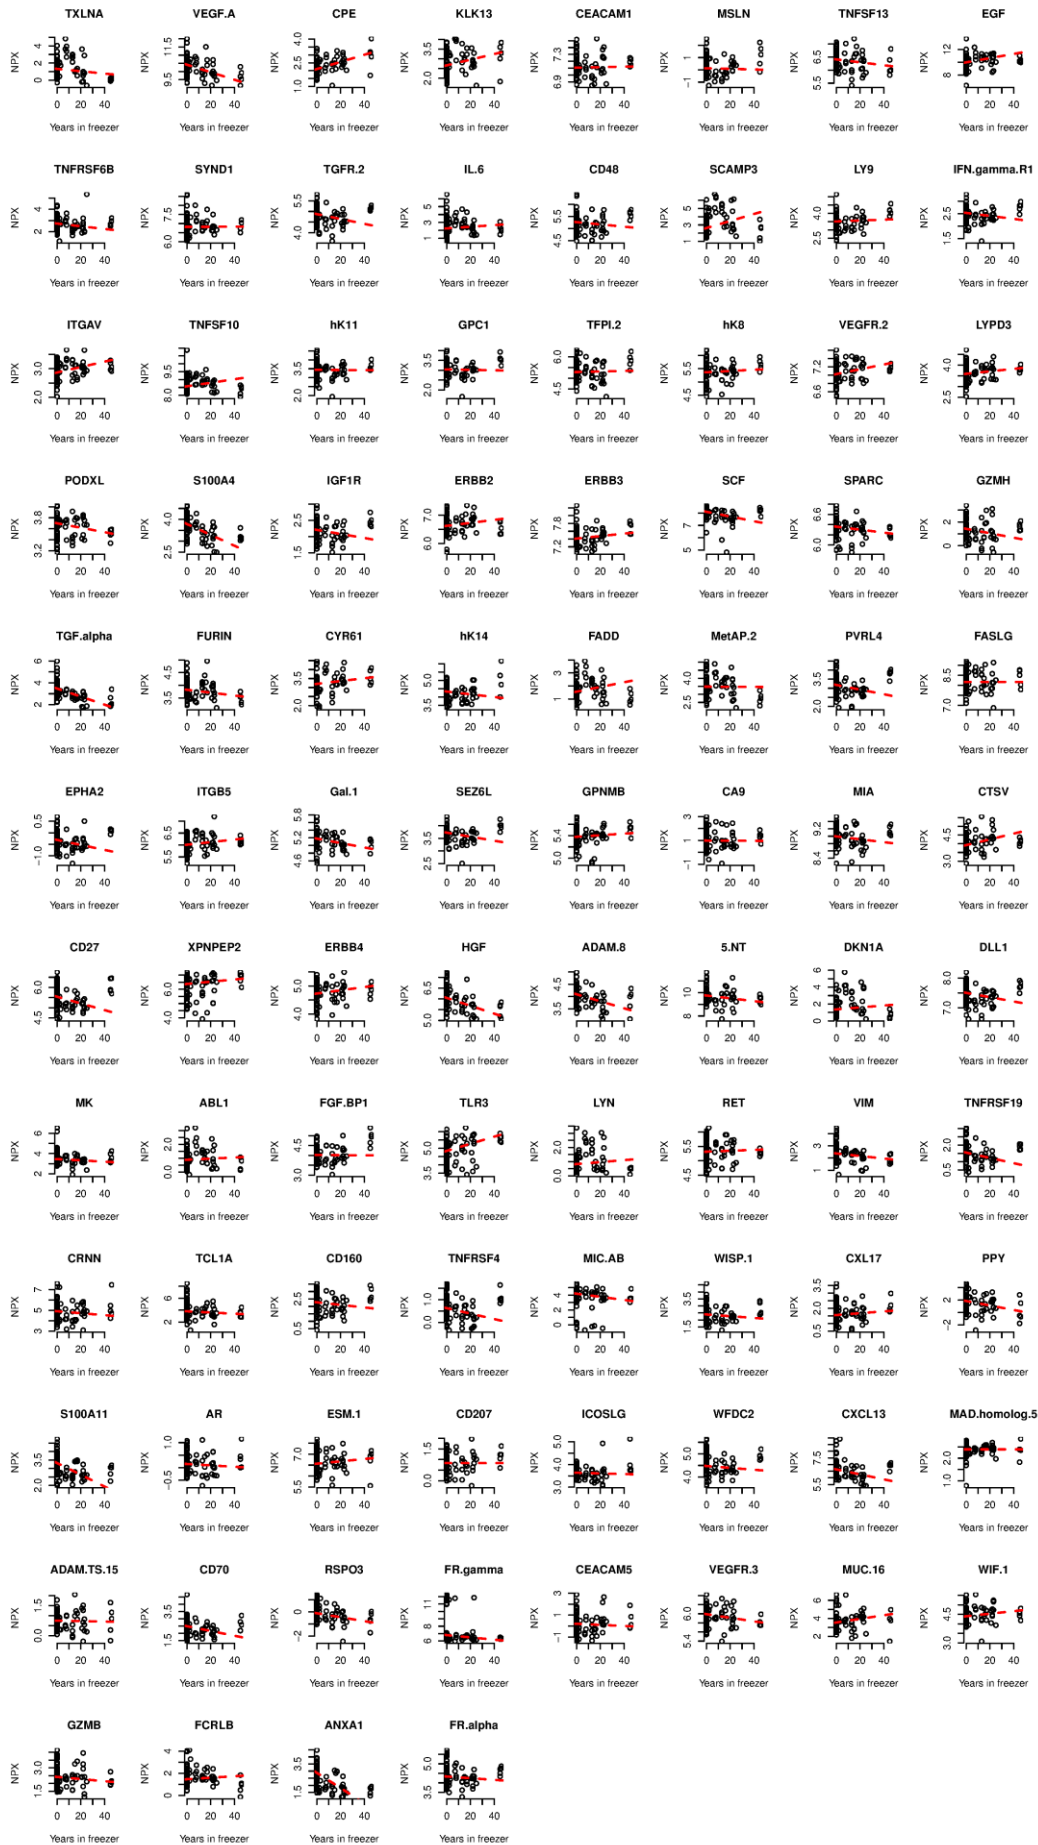

**Supplemental Figure S5.** Individual linear regression models (dashed red lines) for all 92 proteins measured from liquid ULSAM plasma or serum samples stored between 0 and 45 years at -70°C. The models were based on storage time in years and protein abundance as NPX values on a log<sub>2</sub> scale. Protein abundance was normalized for significant effects of age of individuals and sample type (plasma/serum).

**Supplemental Table S1.** Protein assays in the Proseek Multiplex Oncology II panel. See the Olink website for additional information ([www.olink.com](http://www.olink.com)).

| <b>Oncology II</b>                                        |                   |                |
|-----------------------------------------------------------|-------------------|----------------|
| <b>Long Name</b>                                          | <b>Short Name</b> | <b>Uniprot</b> |
| Alpha-taxilin                                             | TXLNA             | P40222         |
| Vascular endothelial growth factor A                      | VEGF-A            | P15692         |
| Carboxypeptidase E                                        | CPE               | P16870         |
| Incubation Control 1                                      | Inc Ctrl 1        | -              |
| Kallikrein-13                                             | KLK13             | Q9UKR3         |
| Carcinoembryonic antigen-related cell adhesion molecule 1 | CEACAM1           | P13688         |
| Mesothelin                                                | MSLN              | Q13421         |
| Tumor necrosis factor ligand superfamily member 13        | TNFSF13           | O75888         |
| Pro-epidermal growth factor                               | EGF               | P01133         |
| Tumor necrosis factor receptor superfamily member 6B      | TNFRSF6B          | O95407         |
| Syndecan-1                                                | SYND1             | P18827         |
| TGF-beta receptor type-2                                  | TGFR-2            | P37173         |
| Interleukin-6                                             | IL-6              | P05231         |
| CD48 antigen                                              | CD48              | P09326         |
| Secretory carrier-associated membrane protein 3           | SCAMP3            | O14828         |
| T-lymphocyte surface antigen Ly-9                         | LY9               | Q9HBG7         |
| Interferon gamma receptor 1                               | IFN-gamma-R1      | P15260         |
| Integrin alpha-V                                          | ITGAV             | P06756         |
| Extension Control                                         | Ext Ctrl          | -              |
| TNF-related apoptosis-inducing ligand                     | TRAIL             | P50591         |
| Kallikrein-11                                             | hK11              | Q9UBX7         |
| Glypican-1                                                | GPC1              | P35052         |
| Tissue factor pathway inhibitor 2                         | TFPI-2            | P48307         |
| Kallikrein-8                                              | hK8               | O60259         |
| Vascular endothelial growth factor receptor 2             | VEGFR-2           | P35968         |
| Ly6/PLAUR domain-containing protein 3                     | LYPD3             | O95274         |
| Podocalyxin                                               | PODXL             | O00592         |
| Protein S100-A4                                           | S100A4            | P26447         |
| Insulin-like growth factor 1 receptor                     | IGF1R             | P08069         |
| Receptor tyrosine-protein kinase erbB-2                   | ERBB2             | P04626         |
| Receptor tyrosine-protein kinase erbB-3                   | ERBB3             | P21860         |
| Stem cell factor                                          | SCF               | P21583         |
| SPARC                                                     | SPARC             | P09486         |

|                                                               |            |                 |
|---------------------------------------------------------------|------------|-----------------|
| Granzyme H                                                    | GZMH       | P20718          |
| Transforming growth factor alpha                              | TGF-alpha  | P01135          |
| Furin                                                         | FURIN      | P09958          |
| Protein CYR61                                                 | CYR61      | O00622          |
| Kallikrein-14                                                 | hK14       | Q9P0G3          |
| FAS-associated death domain protein                           | FADD       | Q13158          |
| Methionine aminopeptidase 2                                   | MetAP 2    | P50579          |
| Nectin-4                                                      | PVRL4      | Q96NY8          |
| Tumor necrosis factor ligand superfamily member 6             | FASLG      | P48023          |
| Ephrin type-A receptor 2                                      | EPHA2      | P29317          |
| Integrin beta-5                                               | ITGB5      | P18084          |
| Galectin-1                                                    | Gal-1      | P09382          |
| Incubation Control 2                                          | Inc Ctrl 2 | -               |
| Detection Control                                             | Det Ctrl   | -               |
| Seizure 6-like protein                                        | SEZ6L      | Q9BYH1          |
| Transmembrane glycoprotein NMB                                | GPNMB      | Q14956          |
| Carbonic anhydrase 9                                          | CA9        | Q16790          |
| Melanoma-derived growth regulatory protein                    | MIA        | Q16674          |
| Cathepsin L2                                                  | CTSV       | O60911          |
| CD27 antigen                                                  | CD27       | P26842          |
| Xaa-Pro aminopeptidase 2                                      | XPNPEP2    | O43895          |
| Receptor tyrosine-protein kinase erbB-4                       | ERBB4      | Q15303          |
| Hepatocyte growth factor                                      | HGF        | P14210          |
| Disintegrin and metalloproteinase domain-containing protein 8 | ADAM 8     | P78325          |
| 5'-nucleotidase                                               | 5'-NT      | P21589          |
| Cyclin-dependent kinase inhibitor 1                           | DKN1A      | P38936          |
| Delta-like protein 1                                          | DLL1       | O00548          |
| Midkine                                                       | MK         | P21741          |
| Tyrosine-protein kinase ABL1                                  | ABL1       | P00519          |
| Fibroblast growth factor-binding protein 1                    | FGF-BP1    | Q14512          |
| Toll-like receptor 3                                          | TLR3       | O15455          |
| Tyrosine-protein kinase Lyn                                   | LYN        | P07948          |
| Proto-oncogene tyrosine-protein kinase receptor Ret           | RET        | P07949          |
| Vimentin                                                      | VIM        | P08670          |
| Tumor necrosis factor receptor superfamily member 19          | TNFRSF19   | Q9NS68          |
| Cornulin                                                      | CRNN       | Q9UBG3          |
| T-cell leukemia / lymphoma protein 1A                         | TCL1A      | P56279          |
| CD160 antigen                                                 | CD160      | O95971          |
| Tumor necrosis factor receptor superfamily member 4           | TNFRSF4    | P43489          |
| MHC class I polypeptide-related sequence A and B              | MIC-A/B    | Q29983 / Q29980 |
| WNT1-inducible-signaling pathway protein 1                    | WISP-1     | O95388          |
| VEGF-co regulated chemokine 1                                 | CXL17      | Q6UXB2          |
| Pancreatic prohormone                                         | PPY        | P01298          |
| Protein S100-A11                                              | S100A11    | P31949          |
| Amphiregulin                                                  | AR         | P15514          |

|                                                                   |               |        |
|-------------------------------------------------------------------|---------------|--------|
| Endothelial cell-specific molecule 1                              | ESM-1         | Q9NQ30 |
| C-type lectin domain family 4 member K                            | CD207         | Q9UJ71 |
| ICOS ligand                                                       | ICOSLG        | O75144 |
| WAP four-disulfide core domain protein 2                          | WFDC2         | Q14508 |
| C-X-C motif chemokine 13                                          | CXCL13        | O43927 |
| Mothers against decapentaplegic homolog 5                         | MAD homolog 5 | Q99717 |
| A disintegrin and metalloproteinase with thrombospondin motifs 15 | ADAM-TS 15    | Q8TE58 |
| CD70 antigen                                                      | CD70          | P32970 |
| R-spondin-3                                                       | RSPO3         | Q9BXY4 |
| Folate receptor gamma                                             | FR-gamma      | P41439 |
| Carcinoembryonic antigen-related cell adhesion molecule 5         | CEACAM5       | P06731 |
| Vascular endothelial growth factor receptor 3                     | VEGFR-3       | P35916 |
| Mucin-16                                                          | MUC-16        | Q8WXI7 |
| Wnt inhibitory factor 1                                           | WIF-1         | Q9Y5W5 |
| Granzyme B                                                        | GZMB          | P10144 |
| Fc receptor-like B                                                | FCRLB         | Q6BAA4 |
| Annexin A1                                                        | ANXA1         | P04083 |
| Folate receptor alpha                                             | FR-alpha      | P15328 |

**Supplemental Table S2.** Description of analyzed wet samples stored at -70°C in the ULSAM biobank and fresh control samples used for normalization purposes.

| Analyzed samples from the ULSAM biobank |                           |                      |             |          |
|-----------------------------------------|---------------------------|----------------------|-------------|----------|
| Name                                    | Age of individual (years) | Storage time (years) | Sample type | Thawed?  |
| U-S1                                    | 51                        | 46                   | Serum       | NA       |
| U-S2                                    | 50                        | 46                   | Serum       | NA       |
| U-S3                                    | 50                        | 45                   | Serum       | NA       |
| U-S4                                    | 50                        | 45                   | Serum       | NA       |
| U-S5                                    | 50                        | 45                   | Serum       | NA       |
| U-S11                                   | 72                        | 25                   | Serum       | Yes      |
| U-S14                                   | 72                        | 22                   | Serum       | Probably |
| U-S15                                   | 71                        | 22                   | Serum       | Probably |
| U-S17                                   | 70                        | 22                   | Serum       | Probably |
| U-S19                                   | 70                        | 21                   | Serum       | Probably |
| U-P21                                   | 71                        | 23                   | EDTA plasma | Yes      |
| U-P23                                   | 71                        | 23                   | EDTA plasma | Probably |
| U-P27                                   | 70                        | 23                   | EDTA plasma | Probably |
| U-P28                                   | 70                        | 22                   | EDTA plasma | Probably |

| Fresh samples analyzed from the department of Clinical Chemistry at Uppsala University Hospital |                           |                   |             |
|-------------------------------------------------------------------------------------------------|---------------------------|-------------------|-------------|
| Name                                                                                            | Age of individual (years) | Age group (years) | Sample type |
| F-P7                                                                                            | 53                        | 50                | EDTA plasma |
| F-P10                                                                                           | 55                        | 50                | EDTA plasma |
| F-P14                                                                                           | 49                        | 50                | EDTA plasma |
| F-P22                                                                                           | 54                        | 50                | EDTA plasma |
| F-P27                                                                                           | 54                        | 50                | EDTA plasma |
| F-S7                                                                                            | 53                        | 50                | serum       |
| F-S10                                                                                           | 55                        | 50                | serum       |
| F-S14                                                                                           | 49                        | 50                | serum       |
| F-S22                                                                                           | 54                        | 50                | serum       |
| F-S27                                                                                           | 54                        | 50                | serum       |
| F-P6                                                                                            | 57                        | 60                | EDTA plasma |
| F-P9                                                                                            | 56                        | 60                | EDTA plasma |
| F-P11                                                                                           | 60                        | 60                | EDTA plasma |
| F-P15                                                                                           | 57                        | 60                | EDTA plasma |

|       |    |    |             |          |       |    |    |             |
|-------|----|----|-------------|----------|-------|----|----|-------------|
| U-P30 | 70 | 21 | EDTA plasma | Probably | F-P16 | 60 | 60 | EDTA plasma |
| U-S42 | 78 | 17 | Serum       | No       | F-S6  | 57 | 60 | serum       |
| U-S43 | 77 | 17 | Serum       | No       | F-S9  | 56 | 60 | serum       |
| U-S45 | 77 | 16 | Serum       | No       | F-S11 | 60 | 60 | serum       |
| U-S48 | 76 | 15 | Serum       | No       | F-S15 | 57 | 60 | serum       |
| U-S49 | 76 | 15 | Serum       | No       | F-S16 | 60 | 60 | serum       |
| U-P51 | 83 | 13 | EDTA plasma | Yes      | F-P2  | 74 | 70 | EDTA plasma |
| U-P52 | 83 | 13 | EDTA plasma | Yes      | F-P5  | 70 | 70 | EDTA plasma |
| U-P53 | 83 | 13 | EDTA plasma | Yes      | F-P13 | 72 | 70 | EDTA plasma |
| U-P54 | 83 | 13 | EDTA plasma | Yes      | F-P18 | 70 | 70 | EDTA plasma |
| U-P55 | 82 | 13 | EDTA plasma | Yes      | F-P24 | 72 | 70 | EDTA plasma |
| U-P61 | 88 | 8  | EDTA plasma | No       | F-S2  | 74 | 70 | serum       |
| U-P62 | 87 | 8  | EDTA plasma | No       | F-S5  | 70 | 70 | serum       |
| U-P63 | 87 | 8  | EDTA plasma | No       | F-S13 | 72 | 70 | serum       |
| U-P64 | 87 | 7  | EDTA plasma | No       | F-S18 | 70 | 70 | serum       |
| U-P65 | 86 | 7  | EDTA plasma | No       | F-S24 | 72 | 70 | serum       |
| U-P71 | 94 | 3  | EDTA plasma | No       | F-P3  | 77 | 80 | EDTA plasma |
| U-P72 | 93 | 2  | EDTA plasma | No       | F-P4  | 75 | 80 | EDTA plasma |
| U-P73 | 92 | 2  | EDTA plasma | No       | F-P12 | 81 | 80 | EDTA plasma |
| U-P74 | 91 | 2  | EDTA plasma | No       | F-P19 | 79 | 80 | EDTA plasma |
| U-P75 | 91 | 2  | EDTA plasma | No       | F-P20 | 82 | 80 | EDTA plasma |
|       |    |    |             |          | F-S3  | 77 | 80 | serum       |
|       |    |    |             |          | F-S4  | 75 | 80 | serum       |
|       |    |    |             |          | F-S12 | 81 | 80 | serum       |
|       |    |    |             |          | F-S19 | 79 | 80 | serum       |
|       |    |    |             |          | F-P1  | 86 | 90 | EDTA plasma |
|       |    |    |             |          | F-P8  | 91 | 90 | EDTA plasma |
|       |    |    |             |          | F-P25 | 86 | 90 | EDTA plasma |
|       |    |    |             |          | F-P26 | 90 | 90 | EDTA plasma |
|       |    |    |             |          | F-P35 | 86 | 90 | EDTA plasma |
|       |    |    |             |          | F-S1  | 86 | 90 | serum       |
|       |    |    |             |          | F-S8  | 91 | 90 | serum       |
|       |    |    |             |          | F-S25 | 86 | 90 | serum       |
|       |    |    |             |          | F-S26 | 90 | 90 | serum       |
|       |    |    |             |          | F-S35 | 86 | 90 | serum       |

**Supplemental Table S3.** Protein assays in the Proseek Multiplex Oncology I v2 panel. See the Olink website for additional information ([www.olink.com](http://www.olink.com)).

| Oncology I v2                        |            |         |
|--------------------------------------|------------|---------|
| Long Name                            | Short Name | Uniprot |
| Interleukin-8                        | IL-8       | P10145  |
| Vascular endothelial growth factor A | VEGF-A     | P15692  |
| Adrenomedullin                       | AM         | P35318  |
| Incubation Control 1                 | Inc Ctrl 1 | -       |

|                                                              |                |         |
|--------------------------------------------------------------|----------------|---------|
| CD40 ligand                                                  | CD40-L         | P29965  |
| Growth/differentiation factor 15                             | GDF-15         | Q99988  |
| Placenta growth factor                                       | PIGF           | P49763  |
| E-selectin                                                   | SELE           | P16581  |
| Macrophage colony-stimulating factor 1                       | CSF-1          | P09603  |
| Immunoglobulin-like transcript 3                             | ILT-3          | Q8NHJ6  |
| Ezrin                                                        | EZR            | P15311  |
| Interleukin-1 receptor antagonist protein                    | IL-1ra         | P18510  |
| Interleukin-6                                                | IL-6           | P05231  |
| Cystatin-B                                                   | CSTB           | P04080  |
| Monocyte chemotactic protein 1                               | MCP-1          | P13500  |
| Kallikrein-6                                                 | KLK6           | Q92876  |
| TNF-related apoptosis-inducing ligand receptor 2             | TRAIL-R2       | O14763  |
| Erythropoietin                                               | EPO            | P01588  |
| Extension Control                                            | Ext Ctrl       | -       |
| Latency-associated peptide transforming growth factor beta-1 | LAP TGF-beta-1 | P01137  |
| Kallikrein-11                                                | hK11           | Q9UBX7  |
| Angiopoietin-1 receptor                                      | TIE2           | Q02763  |
| Tissue factor                                                | TF             | P13726  |
| Tumor necrosis factor receptor 1                             | TNF-R1         | P19438  |
| Platelet-derived growth factor subunit B                     | PDGF subunit B | P01127  |
| Parkinson disease protein 7                                  | PARK7          | Q99497  |
| Interleukin-2                                                | IL-2           | P60568  |
| C-X-C motif chemokine 11                                     | CXCL11         | O14625  |
|                                                              |                | P29460; |
| Interleukin-12                                               | IL-12          | P29459  |
| Vascular endothelial statin                                  | VE-statin      | Q9UHF1  |
| Interleukin-7                                                | IL-7           | P13232  |
| Stem cell factor                                             | SCF            | P21583  |
| C-X-C motif chemokine 9                                      | CXCL9          | Q07325  |
| Interleukin-6 receptor subunit alpha                         | IL-6RA         | P08887  |
| Tumor necrosis factor receptor 2                             | TNF-R2         | P20333  |
| Matrix metalloproteinase-1                                   | MMP-1          | P03956  |
| FAS-associated death domain protein                          | FADD           | Q13158  |
| Tumor necrosis factor ligand superfamily member 14           | TNFSF14        | O43557  |
| Prolactin                                                    | PRL            | P01236  |
| Furin                                                        | FUR            | P09958  |
| Growth hormone                                               | GH             | P01241  |
| Fas antigen ligand                                           | FasL           | P48023  |
| B-cell activating factor                                     | BAFF           | Q9Y275  |
| Tumor necrosis factor receptor superfamily member 6          | FAS            | P25445  |
| C-C motif chemokine 19                                       | CCL19          | Q99731  |
| Incubation Control 2                                         | Inc Ctrl 2     | -       |
| Detection Control                                            | Det Ctrl       | -       |
| Tyrosine-protein phosphatase non-receptor type 22            | PTPN22         | Q9Y2R2  |
| Extracellular matrix metalloproteinase inducer               | EMMPRIN        | P35613  |

|                                                               |            |        |
|---------------------------------------------------------------|------------|--------|
| Carbonic anhydrase IX                                         | CAIX       | Q16790 |
| C-X-C motif chemokine 10                                      | CXCL10     | P02778 |
| Epithelial cell adhesion molecule                             | Ep-CAM     | P16422 |
| Receptor tyrosine-protein kinase erbB-2                       | ErbB2/HER2 | P04626 |
| Receptor tyrosine-protein kinase erbB-3                       | ErbB3/HER3 | P21860 |
| Receptor tyrosine-protein kinase erbB-4                       | ErbB4/HER4 | Q15303 |
| Hepatocyte growth factor                                      | HGF        | P14210 |
| Lipopolysaccharide-induced tumor necrosis factor-alpha factor | LITAF      | Q99732 |
| Myeloid differentiation primary response protein MyD88        | MYD88      | Q99836 |
| Melanoma-derived growth regulatory protein                    | MIA        | Q16674 |
| C-X-C motif chemokine 5                                       | CXCL5      | P42830 |
| Midkine                                                       | MK         | P21741 |
| Urokinase plasminogen activator surface receptor              | U-PAR      | Q03405 |
| Tumor necrosis factor                                         | TNF        | P01375 |
| ICOS ligand                                                   | ICOSLG     | O75144 |
| Cadherin-3                                                    | CDH3       | P22223 |
| Tyrosine-protein kinase Lyn                                   | LYN        | P07948 |
| Fms-related tyrosine kinase 3 ligand                          | Flt3L      | P49771 |
| Vascular endothelial growth factor receptor 2                 | VEGFR-2    | P35968 |
| Heparin-binding EGF-like growth factor                        | HB-EGF     | Q99075 |
| Caspase-3                                                     | CASP-3     | P42574 |
| Early activation antigen CD69                                 | CD69       | Q07108 |
| Tumor necrosis factor receptor superfamily member 4           | TNFRSF4    | P43489 |
| Tartrate-resistant acid phosphatase type 5                    | TR-AP      | P13686 |
| Cyclin-dependent kinase inhibitor 1                           | CDKN1A     | P38936 |
| Regenerating islet-derived protein 4                          | REG-4      | Q9BYZ8 |
| Transforming growth factor alpha                              | TGF-alpha  | P01135 |
| Amphiregulin                                                  | AR         | P15514 |
| Interferon gamma                                              | IFN-gamma  | P01579 |
| MHC class I polypeptide-related sequence A                    | MIC-A      | Q29983 |
| NF-kappa-B essential modulator                                | NEMO       | Q9Y6K9 |
| Vascular endothelial growth factor D                          | VEGF-D     | O43915 |
| Epididymal secretory protein E4                               | HE4        | Q14508 |
| C-X-C motif chemokine 13                                      | CXCL13     | O43927 |
| Epidermal growth factor receptor                              | EGFR       | P00533 |
| Integrin alpha-1                                              | ITGA1      | P56199 |
| Thrombopoietin                                                | THPO       | P40225 |
| Eukaryotic translation initiation factor 4B                   | eIF-4B     | P23588 |
| Carcinoembryonic antigen                                      | CEA        | P06731 |
| Vimentin                                                      | VIM        | P08670 |
| NT-3 growth factor receptor                                   | NTRK3      | Q16288 |
| Ovarian cancer-related tumor marker CA 125                    | CA-125     | Q8WXI7 |
| Prostasin                                                     | PRSS8      | Q16651 |
| Follistatin                                                   | FS         | P19883 |
| Platelet endothelial cell adhesion molecule                   | PECAM-1    | P16284 |

|                           |          |        |
|---------------------------|----------|--------|
| Interleukin-17 receptor B | IL-17RB  | Q9NRM6 |
| Folate receptor alpha     | FR-alpha | P15328 |

**Supplemental Table S4.** The 20 proteins farthest away from the line of equivalence (most highly elevated) in EDTA blood compared to EDTA plasma. The proteins are sorted according to decreasing concentration differences between whole blood and plasma in wet samples. The table also reports the concentration differences for the same proteins in dried samples. The ratio of plasma to cells differs between the wet and dried samples, accounting for the difference of higher average ratios in dried compared to wet samples. The color scale corresponds to the colors of the protein measurements plotted in Fig. 1C and D.

| Short name | UniProt | Fold Change (wet) | Fold Change (dried) | Color scale                                                                          |
|------------|---------|-------------------|---------------------|--------------------------------------------------------------------------------------|
| CASP-3     | P42574  | 163               | 700                 |    |
| NEMO       | Q9Y6K9  | 124               | 239                 |    |
| PTPN22     | Q9Y2R2  | 91                | 58                  |    |
| CDKN1A     | P38936  | 71                | 45                  |    |
| CD69       | Q07108  | 44                | 76                  |    |
| MYD88      | Q99836  | 40                | 58                  |   |
| CD40-L     | P29965  | 37                | 38                  |  |
| eIF-4B     | P23588  | 36                | 120                 |  |
| FADD       | Q13158  | 35                | 115                 |  |
| CXCL11     | O14625  | 30                | 30                  |  |
| LITAF      | Q99732  | 19                | 26                  |  |
| VIM        | P08670  | 18                | 71                  |  |
| CSTB       | P04080  | 11                | 39                  |  |
| TNFSF14    | O43557  | 11                | 10                  |  |
| IL-8       | P10145  | 9                 | 11                  |  |
| IL-1ra     | P18510  | 8                 | 11                  |  |
| CXCL5      | P42830  | 8                 | 12                  |  |
| EZR        | P15311  | 6                 | 18                  |  |
| LYN        | P07948  | 6                 | 18                  |  |
| MCP-1      | P13500  | 3                 | 5                   |  |

**Supplemental Table S5.** Parameter values from ANOVA tests of linear regression models calculated individually for NPX values ( $\log_2$ ) for all 92 proteins measured from DBS stored for 0 to 30 years at +4°C or -24°C.  $\beta$  describes the slope of the linear model in the unit NPX per year. **VarExp** describes the estimated proportion of variation that is explained by the model. **P-val** describes the probability



of the model. **Signif** is set to 1 if the parameter p-val is below the limit for testing of multiple hypotheses (0.05/92) and  $\beta$  is negative.

| Protein      | +4°C    |        |        |        | -24°C   |        |        |        |
|--------------|---------|--------|--------|--------|---------|--------|--------|--------|
|              | $\beta$ | VarExp | p-val  | Signif | $\beta$ | VarExp | p-val  | Signif |
| TXLNA        | -0.0758 | 0.9474 | 0.0000 | 1      | -0.0469 | 0.8378 | 0.0000 | 1      |
| VEGF A       | -0.0559 | 0.7333 | 0.0000 | 1      | -0.0267 | 0.3336 | 0.0025 | 0      |
| CPE          | -0.0427 | 0.7157 | 0.0000 | 1      | -0.0237 | 0.2052 | 0.0230 | 0      |
| KLK13        | -0.0159 | 0.0503 | 0.2921 | 0      | -0.0297 | 0.0837 | 0.1606 | 0      |
| CEACAM1      | -0.0292 | 0.8673 | 0.0000 | 1      | -0.0188 | 0.4657 | 0.0002 | 1      |
| MSLN         | -0.0196 | 0.3181 | 0.0041 | 0      | -0.0377 | 0.4261 | 0.0004 | 1      |
| TNFSF13      | -0.0559 | 0.7690 | 0.0000 | 1      | -0.0357 | 0.4351 | 0.0003 | 1      |
| EGF          | -0.0507 | 0.3537 | 0.0022 | 0      | -0.0502 | 0.2410 | 0.0127 | 0      |
| TNFRSF6B     | -0.0528 | 0.7019 | 0.0000 | 1      | -0.0414 | 0.4847 | 0.0001 | 1      |
| SYND1        | -0.0204 | 0.1382 | 0.0736 | 0      | -0.0272 | 0.3356 | 0.0024 | 0      |
| TGFR 2       | -0.0362 | 0.6417 | 0.0000 | 1      | -0.0331 | 0.5049 | 0.0001 | 1      |
| IL 6         | -0.0731 | 0.4723 | 0.0002 | 1      | -0.0483 | 0.3552 | 0.0017 | 0      |
| CD48         | -0.0594 | 0.8985 | 0.0000 | 1      | -0.0284 | 0.4476 | 0.0003 | 1      |
| SCAMP3       | -0.0509 | 0.8880 | 0.0000 | 1      | -0.0222 | 0.6497 | 0.0000 | 1      |
| LY9          | -0.0590 | 0.7650 | 0.0000 | 1      | -0.0265 | 0.4443 | 0.0003 | 1      |
| IFN gamma R1 | -0.0525 | 0.8109 | 0.0000 | 1      | -0.0291 | 0.6257 | 0.0000 | 1      |
| ITGAV        | -0.0447 | 0.7497 | 0.0000 | 1      | -0.0254 | 0.5521 | 0.0000 | 1      |
| TNFSF10      | -0.0684 | 0.7865 | 0.0000 | 1      | -0.0446 | 0.4599 | 0.0002 | 1      |
| hK11         | 0.0590  | 0.1247 | 0.0905 | 0      | -0.0607 | 0.1200 | 0.0899 | 0      |
| GPC1         | -0.0312 | 0.5458 | 0.0000 | 1      | -0.0140 | 0.1941 | 0.0275 | 0      |
| TFPI 2       | -0.0429 | 0.5290 | 0.0001 | 1      | -0.0185 | 0.1092 | 0.1067 | 0      |
| hK8          | -0.0125 | 0.0345 | 0.3847 | 0      | -0.0330 | 0.1410 | 0.0644 | 0      |
| VEGFR 2      | -0.0590 | 0.8644 | 0.0000 | 1      | -0.0187 | 0.2535 | 0.0103 | 0      |
| LYPD3        | 0.0434  | 0.1837 | 0.0367 | 0      | -0.0294 | 0.0709 | 0.1983 | 0      |
| PODXL        | -0.0470 | 0.7221 | 0.0000 | 1      | -0.0267 | 0.5322 | 0.0001 | 1      |
| S100A4       | -0.0228 | 0.5661 | 0.0000 | 1      | -0.0127 | 0.3086 | 0.0039 | 0      |
| IGF1R        | -0.0460 | 0.7877 | 0.0000 | 1      | -0.0277 | 0.3060 | 0.0041 | 0      |
| ERBB2        | -0.0479 | 0.8570 | 0.0000 | 1      | -0.0254 | 0.4982 | 0.0001 | 1      |
| ERBB3        | -0.0491 | 0.8696 | 0.0000 | 1      | -0.0287 | 0.4949 | 0.0001 | 1      |
| SCF          | -0.0653 | 0.7972 | 0.0000 | 1      | -0.0187 | 0.0774 | 0.1781 | 0      |
| SPARC        | -0.0262 | 0.7222 | 0.0000 | 1      | -0.0068 | 0.1231 | 0.0855 | 0      |
| GZMH         | 0.0551  | 0.1680 | 0.0467 | 0      | 0.0397  | 0.1352 | 0.0705 | 0      |
| TGF alpha    | -0.0459 | 0.4129 | 0.0007 | 0      | -0.0155 | 0.0311 | 0.3994 | 0      |
| FURIN        | -0.0541 | 0.7849 | 0.0000 | 1      | -0.0343 | 0.5472 | 0.0000 | 1      |
| CYR61        | -0.0618 | 0.6208 | 0.0000 | 1      | -0.0345 | 0.2331 | 0.0145 | 0      |
| hK14         | 0.0162  | 0.0385 | 0.3582 | 0      | -0.0551 | 0.2595 | 0.0093 | 0      |
| FADD         | 0.0179  | 0.3353 | 0.0030 | 0      | 0.0004  | 0.0001 | 0.9613 | 0      |
| MetAP 2      | -0.0159 | 0.7437 | 0.0000 | 1      | -0.0080 | 0.0788 | 0.1741 | 0      |
| PVRL4        | -0.0392 | 0.5759 | 0.0000 | 1      | -0.0302 | 0.3999 | 0.0007 | 0      |
| FASLG        | -0.0439 | 0.4627 | 0.0003 | 1      | -0.0233 | 0.1842 | 0.0323 | 0      |
| EPHA2        | -0.0246 | 0.6721 | 0.0000 | 1      | -0.0150 | 0.3699 | 0.0013 | 0      |

|               |         |        |        |   |         |        |        |   |
|---------------|---------|--------|--------|---|---------|--------|--------|---|
| ITGB5         | -0.1154 | 0.8332 | 0.0000 | 1 | -0.0629 | 0.5255 | 0.0000 | 1 |
| Gal 1         | 0.0119  | 0.3020 | 0.0054 | 0 | -0.0216 | 0.4916 | 0.0001 | 1 |
| SEZ6L         | -0.0598 | 0.7045 | 0.0000 | 1 | -0.0270 | 0.3715 | 0.0012 | 0 |
| GPNMB         | -0.0035 | 0.0151 | 0.5676 | 0 | -0.0054 | 0.0173 | 0.5312 | 0 |
| CA9           | -0.0082 | 0.1080 | 0.1169 | 0 | 0.0035  | 0.0005 | 0.9261 | 0 |
| MIA           | -0.0299 | 0.5997 | 0.0000 | 1 | -0.0154 | 0.0282 | 0.4224 | 0 |
| CTSV          | 0.0475  | 0.0872 | 0.1612 | 0 | -0.0452 | 0.0979 | 0.1277 | 0 |
| CD27          | -0.0710 | 0.8004 | 0.0000 | 1 | -0.0340 | 0.3399 | 0.0022 | 0 |
| XPNPEP2       | -0.0604 | 0.3677 | 0.0017 | 0 | -0.0162 | 0.0238 | 0.4620 | 0 |
| ERBB4         | -0.0389 | 0.6769 | 0.0000 | 1 | -0.0111 | 0.0365 | 0.3605 | 0 |
| HGF           | -0.0515 | 0.5559 | 0.0000 | 1 | -0.0708 | 0.4037 | 0.0006 | 0 |
| ADAM 8        | -0.0742 | 0.6879 | 0.0000 | 1 | -0.0522 | 0.2115 | 0.0207 | 0 |
| 5 NT          | -0.0667 | 0.5371 | 0.0000 | 1 | -0.0167 | 0.0496 | 0.2848 | 0 |
| DKN1A         | -0.0556 | 0.5377 | 0.0000 | 1 | -0.0555 | 0.3254 | 0.0029 | 0 |
| DLL1          | -0.0737 | 0.8428 | 0.0000 | 1 | -0.0392 | 0.5567 | 0.0000 | 1 |
| MK            | -0.0846 | 0.7743 | 0.0000 | 1 | -0.0240 | 0.1418 | 0.0636 | 0 |
| ABL1          | -0.0836 | 0.9178 | 0.0000 | 1 | -0.0349 | 0.2319 | 0.0148 | 0 |
| FGF BP1       | 0.0247  | 0.0458 | 0.3155 | 0 | -0.0129 | 0.0216 | 0.4837 | 0 |
| TLR3          | -0.0776 | 0.7155 | 0.0000 | 1 | -0.0180 | 0.0585 | 0.2440 | 0 |
| LYN           | -0.0181 | 0.5110 | 0.0001 | 1 | -0.0004 | 0.0001 | 0.9612 | 0 |
| RET           | -0.0289 | 0.5141 | 0.0001 | 1 | -0.0179 | 0.2733 | 0.0073 | 0 |
| VIM           | -0.0040 | 0.0378 | 0.3625 | 0 | 0.0182  | 0.0799 | 0.1710 | 0 |
| TNFRSF19      | -0.0311 | 0.4691 | 0.0002 | 1 | 0.0051  | 0.0014 | 0.8570 | 0 |
| CRNN          | -0.0593 | 0.2156 | 0.0223 | 0 | -0.0363 | 0.0809 | 0.1682 | 0 |
| TCL1A         | -0.0037 | 0.0200 | 0.5093 | 0 | 0.0065  | 0.1263 | 0.0813 | 0 |
| CD160         | -0.0382 | 0.5450 | 0.0000 | 1 | 0.0059  | 0.0055 | 0.7256 | 0 |
| TNFRSF4       | -0.0454 | 0.6999 | 0.0000 | 1 | -0.0011 | 0.0000 | 0.9769 | 0 |
| MIC AB        | -0.0545 | 0.4061 | 0.0008 | 0 | -0.0194 | 0.1824 | 0.0332 | 0 |
| WISP 1        | -0.0488 | 0.6470 | 0.0000 | 1 | -0.0174 | 0.1868 | 0.0310 | 0 |
| CXL17         | -0.0643 | 0.7548 | 0.0000 | 1 | -0.0355 | 0.3864 | 0.0009 | 0 |
| PPY           | -0.0172 | 0.0826 | 0.1732 | 0 | 0.0133  | 0.0094 | 0.6759 | 0 |
| S100A11       | -0.0008 | 0.0047 | 0.7510 | 0 | 0.0077  | 0.0384 | 0.3481 | 0 |
| AR            | -0.0178 | 0.1592 | 0.0534 | 0 | -0.0252 | 0.2386 | 0.0132 | 0 |
| ESM 1         | -0.0427 | 0.7518 | 0.0000 | 1 | -0.0273 | 0.2999 | 0.0046 | 0 |
| CD207         | -0.0199 | 0.6107 | 0.0000 | 1 | -0.0041 | 0.0163 | 0.6134 | 0 |
| ICOSLG        | -0.0005 | 0.0006 | 0.9105 | 0 | -0.0160 | 0.2862 | 0.0059 | 0 |
| WFDC2         | -0.0502 | 0.4818 | 0.0002 | 1 | -0.0274 | 0.1643 | 0.0444 | 0 |
| CXCL13        | -0.0514 | 0.5966 | 0.0000 | 1 | -0.0197 | 0.1503 | 0.0555 | 0 |
| MAD homolog 5 | -0.0491 | 0.6786 | 0.0000 | 1 | -0.0095 | 0.0828 | 0.1630 | 0 |
| ADAM TS 15    | -0.0495 | 0.6927 | 0.0000 | 1 | -0.0221 | 0.4463 | 0.0003 | 1 |
| CD70          | -0.0148 | 0.2815 | 0.0077 | 0 | -0.0079 | 0.0812 | 0.5356 | 0 |
| RSPO3         | -0.0230 | 0.4720 | 0.0002 | 1 | -0.0064 | 0.0342 | 0.3763 | 0 |
| FR gamma      | -0.0855 | 0.0878 | 0.1598 | 0 | 0.0097  | 0.0026 | 0.8075 | 0 |
| CEACAM5       | 0.0286  | 0.1295 | 0.0841 | 0 | -0.0306 | 0.0836 | 0.2959 | 0 |
| VEGFR 3       | -0.0329 | 0.4558 | 0.0003 | 1 | -0.0267 | 0.3200 | 0.0032 | 0 |
| MUC 16        | -0.0500 | 0.4479 | 0.0003 | 1 | -0.0153 | 0.0410 | 0.3318 | 0 |

|          |         |        |        |   |         |        |        |   |
|----------|---------|--------|--------|---|---------|--------|--------|---|
| WIF 1    | -0.0697 | 0.8562 | 0.0000 | 1 | -0.0368 | 0.5401 | 0.0000 | 1 |
| GZMB     | 0.0230  | 0.1115 | 0.1107 | 0 | 0.0214  | 0.1418 | 0.0636 | 0 |
| FCRLB    | -0.0064 | 0.2469 | 0.0135 | 0 | 0.0000  | 0.0000 | 0.9970 | 0 |
| ANXA1    | -0.0027 | 0.0539 | 0.2749 | 0 | -0.0092 | 0.2235 | 0.0170 | 0 |
| FR alpha | -0.0363 | 0.5176 | 0.0001 | 1 | -0.0525 | 0.4966 | 0.0001 | 1 |

**Supplemental Table S6.** Parameter values from ANOVA tests of linear regression models calculated individually from NPX values ( $\log_2$ ) for all 92 proteins measured for ULSAM plasma and serum samples stored at  $-70^\circ\text{C}$ .  $\beta$  describes the slope of the linear model in the unit NPX per year. **VarExp** describes the estimated proportion of variation explained by the model. **P-val** represents the probability of the model. **Signif** is set to 1 if the parameter p-val is below the limit for testing of multiple hypotheses ( $0.05/92$ ) and  $\beta$  is negative. Fresh control samples were used to evaluate effects of age of individuals and sample type (plasma/serum) on protein abundance. **P-val Age** describes the probability that there was a correlation between measured protein abundance and age of individuals. **P-val Type** describes the probability that there was a difference between measured protein abundance in plasma and serum. **Signif Age** and **Signif Type** is set to 1 if the parameters p-val Age and p-val Type, respectively is nominally significant ( $<0.05$ ). These nominally significant models for individual age and sample type dependence evaluate from the control samples were used to normalize the ULSAM samples.

| Protein      | $\beta$ | VarExp | p-val  | Signif | p-val Age | Signif Age | p-val Type | Signif Type |
|--------------|---------|--------|--------|--------|-----------|------------|------------|-------------|
| TXLNA        | -0.0233 | 0.0693 | 0.0155 | 0      | 0.0183    | 1          | 0.6051     | 0           |
| VEGF A       | -0.0165 | 0.1235 | 0.0010 | 0      | 0.6848    | 0          | 0.0000     | 1           |
| CPE          | 0.0199  | 0.2238 | 0.0000 | 0      | 0.0120    | 1          | 0.1451     | 0           |
| KLK13        | 0.0091  | 0.0336 | 0.0952 | 0      | 0.0081    | 1          | 0.3543     | 0           |
| CEACAM1      | 0.0009  | 0.0059 | 0.4883 | 0      | 0.3024    | 0          | 0.0000     | 1           |
| MSLN         | 0.0113  | 0.0331 | 0.0978 | 0      | 0.0011    | 1          | 0.3842     | 0           |
| TNFSF13      | -0.0065 | 0.0504 | 0.0400 | 0      | 0.0000    | 1          | 0.1896     | 0           |
| EGF          | 0.0164  | 0.0319 | 0.1041 | 0      | 0.9897    | 0          | 0.0000     | 1           |
| TNFRSF6B     | -0.0016 | 0.0009 | 0.7810 | 0      | 0.0001    | 1          | 0.0004     | 1           |
| SYND1        | -0.0004 | 0.0001 | 0.9265 | 0      | 0.0956    | 0          | 0.0033     | 1           |
| TGFR 2       | -0.0013 | 0.0014 | 0.7334 | 0      | 0.0000    | 1          | 0.0036     | 1           |
| IL 6         | -0.0071 | 0.0060 | 0.4852 | 0      | 0.0562    | 0          | 0.1708     | 0           |
| CD48         | 0.0021  | 0.0046 | 0.5418 | 0      | 0.0003    | 1          | 0.0081     | 1           |
| SCAMP3       | 0.0050  | 0.0020 | 0.6866 | 0      | 0.0885    | 0          | 0.2925     | 0           |
| LY9          | 0.0104  | 0.0750 | 0.0117 | 0      | 0.0003    | 1          | 0.1385     | 0           |
| IFN gamma R1 | 0.0010  | 0.0015 | 0.7234 | 0      | 0.0000    | 1          | 0.0020     | 1           |
| ITGAV        | 0.0055  | 0.0526 | 0.0359 | 0      | 0.0816    | 0          | 0.5866     | 0           |
| TNFSF10      | -0.0056 | 0.0191 | 0.2099 | 0      | 0.0178    | 1          | 0.0062     | 1           |
| hK11         | 0.0024  | 0.0046 | 0.5418 | 0      | 0.0000    | 1          | 0.0373     | 1           |
| GPC1         | 0.0053  | 0.0310 | 0.1092 | 0      | 0.0000    | 1          | 0.0019     | 1           |
| TFPI 2       | 0.0025  | 0.0047 | 0.5343 | 0      | 0.0000    | 1          | 0.3731     | 0           |
| hK8          | 0.0043  | 0.0201 | 0.1982 | 0      | 0.0067    | 1          | 0.0127     | 1           |
| VEGFR 2      | 0.0035  | 0.0397 | 0.0693 | 0      | 0.0035    | 1          | 0.0075     | 1           |

|           |         |        |        |   |        |   |        |   |
|-----------|---------|--------|--------|---|--------|---|--------|---|
| LYPD3     | 0.0045  | 0.0197 | 0.2030 | 0 | 0.4761 | 0 | 0.0587 | 0 |
| PODXL     | -0.0022 | 0.0176 | 0.2291 | 0 | 0.4119 | 0 | 0.0003 | 1 |
| S100A4    | -0.0167 | 0.2114 | 0.0000 | 1 | 0.5728 | 0 | 0.0000 | 1 |
| IGF1R     | 0.0020  | 0.0075 | 0.4344 | 0 | 0.0000 | 1 | 0.0000 | 1 |
| ERBB2     | 0.0011  | 0.0016 | 0.7172 | 0 | 0.0912 | 0 | 0.0042 | 1 |
| ERBB3     | 0.0039  | 0.0474 | 0.0466 | 0 | 0.0656 | 0 | 0.0000 | 1 |
| SCF       | -0.0072 | 0.0242 | 0.1574 | 0 | 0.0302 | 1 | 0.0025 | 1 |
| SPARC     | -0.0029 | 0.0393 | 0.0706 | 0 | 0.3035 | 0 | 0.0000 | 1 |
| GZMH      | -0.0060 | 0.0089 | 0.3933 | 0 | 0.0003 | 1 | 0.0008 | 1 |
| TGF alpha | -0.0334 | 0.2866 | 0.0000 | 1 | 0.9043 | 0 | 0.0000 | 1 |
| FURIN     | -0.0055 | 0.0354 | 0.0864 | 0 | 0.5024 | 0 | 0.0000 | 1 |
| CYR61     | 0.0100  | 0.0490 | 0.0431 | 0 | 0.0000 | 1 | 0.0003 | 1 |
| hK14      | 0.0106  | 0.0587 | 0.0264 | 0 | 0.0005 | 1 | 0.2873 | 0 |
| FADD      | -0.0051 | 0.0065 | 0.4657 | 0 | 0.4697 | 0 | 0.0079 | 1 |
| MetAP 2   | -0.0133 | 0.0624 | 0.0219 | 0 | 0.0884 | 0 | 0.0341 | 1 |
| PVRL4     | 0.0029  | 0.0049 | 0.5274 | 0 | 0.0000 | 1 | 0.0464 | 1 |
| FASLG     | 0.0003  | 0.0000 | 0.9521 | 0 | 0.8525 | 0 | 0.8766 | 0 |
| EPHA2     | 0.0022  | 0.0051 | 0.5183 | 0 | 0.0000 | 1 | 0.0408 | 1 |
| ITGB5     | 0.0060  | 0.0450 | 0.0528 | 0 | 0.0001 | 1 | 0.0018 | 1 |
| Gal 1     | -0.0041 | 0.0548 | 0.0320 | 0 | 0.0020 | 1 | 0.0036 | 1 |
| SEZ6L     | 0.0008  | 0.0012 | 0.7533 | 0 | 0.0000 | 1 | 0.0001 | 1 |
| GPNMB     | 0.0021  | 0.0207 | 0.1914 | 0 | 0.0001 | 1 | 0.0066 | 1 |
| CA9       | 0.0032  | 0.0025 | 0.6496 | 0 | 0.0064 | 1 | 0.1305 | 0 |
| MIA       | -0.0008 | 0.0017 | 0.7058 | 0 | 0.0002 | 1 | 0.0059 | 1 |
| CTSV      | 0.0075  | 0.0326 | 0.1005 | 0 | 0.0017 | 1 | 0.0461 | 1 |
| CD27      | 0.0007  | 0.0003 | 0.8836 | 0 | 0.0000 | 1 | 0.0766 | 0 |
| XPNPEP2   | 0.0119  | 0.0330 | 0.0979 | 0 | 0.0550 | 0 | 0.2121 | 0 |
| ERBB4     | 0.0040  | 0.0213 | 0.1856 | 0 | 0.0941 | 0 | 0.0006 | 1 |
| HGF       | -0.0186 | 0.2024 | 0.0000 | 1 | 0.0242 | 1 | 0.0000 | 1 |
| ADAM 8    | -0.0114 | 0.1413 | 0.0004 | 1 | 0.0097 | 1 | 0.0000 | 1 |
| 5 NT      | -0.0113 | 0.0425 | 0.0600 | 0 | 0.0598 | 0 | 0.0001 | 1 |
| DKN1A     | -0.0025 | 0.0007 | 0.8109 | 0 | 0.1772 | 0 | 0.8108 | 0 |
| DLL1      | -0.0001 | 0.0000 | 0.9612 | 0 | 0.0000 | 1 | 0.0044 | 1 |
| MK        | -0.0066 | 0.0149 | 0.2685 | 0 | 0.0000 | 1 | 0.5972 | 0 |
| ABL1      | -0.0055 | 0.0099 | 0.3668 | 0 | 0.0029 | 1 | 0.3502 | 0 |
| FGF BP1   | 0.0125  | 0.1253 | 0.0010 | 0 | 0.0253 | 1 | 0.1022 | 0 |
| TLR3      | 0.0162  | 0.0727 | 0.0131 | 0 | 0.6730 | 0 | 0.1478 | 0 |
| LYN       | -0.0006 | 0.0001 | 0.9274 | 0 | 0.1001 | 0 | 0.0351 | 1 |
| RET       | -0.0018 | 0.0031 | 0.6146 | 0 | 0.0002 | 1 | 0.0000 | 1 |
| VIM       | -0.0182 | 0.0991 | 0.0035 | 0 | 0.0011 | 1 | 0.0000 | 1 |
| TNFRSF19  | -0.0015 | 0.0010 | 0.7759 | 0 | 0.0000 | 1 | 0.0066 | 1 |
| CRNN      | 0.0003  | 0.0000 | 0.9682 | 0 | 0.5959 | 0 | 0.2916 | 0 |
| TCL1A     | -0.0183 | 0.0276 | 0.1308 | 0 | 0.0793 | 0 | 0.0004 | 1 |
| CD160     | 0.0013  | 0.0006 | 0.8316 | 0 | 0.0000 | 1 | 0.1371 | 0 |
| TNFRSF4   | -0.0022 | 0.0026 | 0.6481 | 0 | 0.0000 | 1 | 0.0394 | 1 |
| MIC AB    | -0.0046 | 0.0014 | 0.7310 | 0 | 0.3235 | 0 | 0.5504 | 0 |

|               |         |        |        |   |        |   |        |   |
|---------------|---------|--------|--------|---|--------|---|--------|---|
| WISP 1        | -0.0005 | 0.0001 | 0.9270 | 0 | 0.0000 | 1 | 0.0000 | 1 |
| CXL17         | 0.0054  | 0.0125 | 0.3114 | 0 | 0.0000 | 1 | 0.0002 | 1 |
| PPY           | -0.0394 | 0.1051 | 0.0026 | 0 | 0.0054 | 1 | 0.8085 | 0 |
| S100A11       | -0.0161 | 0.1072 | 0.0024 | 0 | 0.0569 | 0 | 0.2343 | 0 |
| AR            | -0.0010 | 0.0009 | 0.7830 | 0 | 0.0000 | 1 | 0.0092 | 1 |
| ESM 1         | -0.0007 | 0.0004 | 0.8564 | 0 | 0.0001 | 1 | 0.3438 | 0 |
| CD207         | 0.0040  | 0.0126 | 0.3088 | 0 | 0.0000 | 1 | 0.0140 | 1 |
| ICOSLG        | 0.0041  | 0.0271 | 0.1344 | 0 | 0.0011 | 1 | 0.0000 | 1 |
| WFDC2         | 0.0006  | 0.0002 | 0.8869 | 0 | 0.0000 | 1 | 0.0294 | 1 |
| CXCL13        | -0.0098 | 0.0357 | 0.0851 | 0 | 0.0005 | 1 | 0.0085 | 1 |
| MAD homolog 5 | 0.0021  | 0.0095 | 0.3788 | 0 | 0.0179 | 1 | 0.1693 | 0 |
| ADAM TS 15    | -0.0017 | 0.0021 | 0.6757 | 0 | 0.0017 | 1 | 0.0000 | 1 |
| CD70          | -0.0050 | 0.0132 | 0.2980 | 0 | 0.0031 | 1 | 0.0087 | 1 |
| RSPO3         | -0.0203 | 0.1319 | 0.0007 | 0 | 0.0000 | 1 | 0.4910 | 0 |
| FR gamma      | -0.0575 | 0.0918 | 0.0051 | 0 | 0.3064 | 0 | 0.5196 | 0 |
| CEACAM5       | 0.0058  | 0.0055 | 0.5038 | 0 | 0.0099 | 1 | 0.4080 | 0 |
| VEGFR 3       | -0.0029 | 0.0310 | 0.1090 | 0 | 0.1731 | 0 | 0.0000 | 1 |
| MUC 16        | 0.0022  | 0.0008 | 0.7983 | 0 | 0.2216 | 0 | 0.1328 | 0 |
| WIF 1         | 0.0013  | 0.0017 | 0.7102 | 0 | 0.0050 | 1 | 0.0000 | 1 |
| GZMB          | -0.0070 | 0.0176 | 0.2295 | 0 | 0.1547 | 0 | 0.0012 | 1 |
| FCRLB         | -0.0138 | 0.0549 | 0.0319 | 0 | 0.9737 | 0 | 0.6774 | 0 |
| ANXA1         | -0.0324 | 0.2579 | 0.0000 | 1 | 0.3169 | 0 | 0.4410 | 0 |
| FR alpha      | -0.0015 | 0.0013 | 0.7409 | 0 | 0.0000 | 1 | 0.0195 | 1 |
